# Supplementary material for: Expanded roles of leucine-responsive regulatory protein in transcription regulation of the Escherichia coli genome: Genomic SELEX screening of the regulation targets
Source: PubMed Central journal article supplement (PMC5320599; doi:10.1099/mgen.0.000001), 2015-07-15
Supplement: mgen-01-1-s001.pdf [file mgen-01-1-s001.pdf]

Supplementary data

Journal name: MICROBIAL GENOMICS

Article title: Expanded roles of Lrp in transcription regulation of the *Escherichia coli* genome: Genomic SELEX screening of the regulation targets

Author names: Tomohiro Shimada, Natsumi Saito, Michihisa Maeda, Kan Tanaka and Akira Ishihama

Affiliation of the corresponding author: Chemical Resources Laboratory, Tokyo Institute of Technology, Nagatsuda, Yokohama, Japan

Email address of the corresponding author: tshimada@res.titech.ac.jp

This article has 3 supplemental tables.

**Supplemental Table S1. Lrp-binding sites on the *E. coli* genome.** Genomic SELEX screening of Lrp-binding sequences were identified in a total of 314 sites on the *E. coli* genome (see Table 1). When Lrp-binding sites are located within spacer regions, only the flanking genes are indicated. The direction of transcription is shown by arrows. The genes shown in parentheses carry the Lrp-binding sites on the open reading frames. These Lrp-binding sites are classified into four groups: Type-A spacer; type-B spacer; type-C spacer; and inside open reading frames. Type-A and type-B spacers and their flanking genes are listed in this table.

**Supplemental Table S2. Amino acids and peptides affecting the growth of *lrp* mutant.** Compounds affecting the growth retardation are listed in (1). Compounds affecting the growth enhancement are listed in (2). The growth curves are shown in Figure 2.

**Supplemental Table S3. The concentration of metabolites in wild-type strain and the *lrp* mutant.** The intracellular levels of metabolites in *E. coli* wild-type BW25113 and its *lrp* mutant JW0872 were determined by TOF/MS analysis. Details of these determinations are described in this table. The results of major metabolites are shown in Figures 3 and 4.

**Supplemental Table S1**  
**Lrp-binding sites on the *E. coli* genome (SELEX screening)**

**Type-A spacers**

| Position | Function                                 | Operon                                   | Gene         | D | Lrp | D | Gene          | Operon                                                 | Function                                   |
|----------|------------------------------------------|------------------------------------------|--------------|---|-----|---|---------------|--------------------------------------------------------|--------------------------------------------|
| 42168    | predicted transporter                    | <i>cai</i> TABCDE                        | <i>cai</i> T | < |     | > | <i>fixA</i>   | <i>fix</i> ABCX                                        | electron transfer flavoprotein             |
| 83830    | <i>leu</i> operon leader peptide         | <i>leu</i> LABCD                         | <i>leu</i> L | < |     | > | <i>leu</i> O  | <i>leu</i> O                                           | transcription factor                       |
| 255832   | aminoacyl-histidine dipeptidase          | <i>pep</i> D                             | <i>pep</i> D | < |     | > | <i>gpt</i>    | <i>gpt</i>                                             | guanine-xanthine phosphoribosyltransferase |
| 310970   | transcription factor                     | <i>mat</i> A                             | <i>mat</i> A | < |     | > | <i>ykg</i> L  | <i>ykg</i> L                                           | predicted protein                          |
| 400468   | D-alanine-D-alanine ligase A             | <i>ddl</i> A                             | <i>ddl</i> A | < |     | > | <i>ira</i> P  | <i>ira</i> P                                           | predicted protein                          |
| 584962   | DLP12 prophage OM protease VII           | <i>omp</i> T                             | <i>omp</i> T | < |     | > | <i>pau</i> D  | <i>pau</i> D                                           | Xaa tRNA                                   |
| 632754   | predicted oxidoreductase                 | <i>ydb</i> H- <i>ydb</i> E- <i>ydb</i> L | <i>ydb</i> H | < |     | > | <i>ybd</i> L  | <i>ybd</i> L                                           | methionine aminotransferase                |
| 651072   | citrate lyase synthetase                 | <i>cit</i> CDEFXG                        | <i>cit</i> C | < |     | > | <i>dpi</i> B  | <i>dpi</i> BA                                          | CitAB TCS sensor kinase                    |
| 655436   | anaerobic C4-dicarboxylate transport     | <i>dcu</i> C                             | <i>dcu</i> C | < |     | > | <i>pag</i> P  | <i>pag</i> P                                           | palmitoyl transferase for Lipid A          |
| 675858   | conserved protein                        | <i>ybe</i> Q                             | <i>ybe</i> Q | < |     | > | <i>ybe</i> R  | <i>ybe</i> R- <i>djl</i> B                             | predicted protein                          |
| 784656   | conserved protein                        | <i>ybg</i> S                             | <i>ybg</i> S | < |     | > | <i>aro</i> G  | <i>aro</i> G                                           | 2-dehydro-3-deoxyphosphoheptonate aldolase |
| 815960   | NAD(P)-binding Rossmann-fold             | <i>ybh</i> K                             | <i>ybh</i> K | < |     | > | <i>moa</i> A  | <i>moa</i> ABCDE                                       | molybdopterin biosynthesis protein A       |
| 823832   | predicted DNase                          | <i>ybh</i> PON                           | <i>ybh</i> P | < |     | > | <i>ybh</i> Q  | <i>ybh</i> Q                                           | predicted IM protein                       |
| 865772   | molybdopterin biosynthesis protein       | <i>moe</i> AB                            | <i>moe</i> A | < |     | > | <i>iaa</i> A  | <i>iaa</i> A- <i>qsi</i> ABCD                          | L-asparaginase                             |
| 915432   | aquaporin                                | <i>agp</i> Z                             | <i>agp</i> Z | < |     | > | <i>ybj</i> D  | <i>ybj</i> D                                           | nucleoside triphosphate hydrolase          |
| 931532   | thioredoxin reductase                    | <i>trx</i> B                             | <i>trx</i> B | < |     | > | <i>lrp</i>    | <i>lrp</i>                                             | transcription factor                       |
| 1E+06    | predicted OM protein                     | <i>pga</i> ABCD                          | <i>pga</i> A | < |     | > | <i>ycd</i> T  | <i>ycd</i> T                                           | predicted diguanylate cyclase              |
| 1E+06    | e14 prophage IM protein                  | <i>ymf</i> ED                            | <i>ymf</i> E | < |     | > | <i>lit</i>    | <i>lit</i>                                             | e14 prophage cell death peptidase          |
| 1E+06    | conserved protein                        | <i>ycq</i> B                             | <i>ycq</i> B | < |     | > | <i>dad</i> A  | <i>dad</i> AX                                          | D-amino acid dehydrogenase                 |
| 1E+06    | calcium/sodium:proton antiporter         | <i>cha</i> A                             | <i>cha</i> A | < |     | > | <i>cha</i> B  | <i>cha</i> BC                                          | predicted cation regulator                 |
| 1E+06    | aldehyde-alcohol dehydrogenase           | <i>adh</i> E                             | <i>adh</i> E | < |     | > | <i>yche</i> E | <i>yche</i> E                                          | predicted IM protein                       |
| 1E+06    | predicted protein                        | <i>yci</i> N                             | <i>yci</i> N | < |     | > | <i>top</i> A  | <i>top</i> A                                           | DNA topoisomerase I                        |
| 1E+06    | GGDEF diguanylate cyclase                | <i>yda</i> M                             | <i>yda</i> M | < |     | > | <i>yda</i> N  | <i>yda</i> N                                           | predicted Zn(II) transporter               |
| 2E+06    | biofilm-dependent modulation protein     | <i>bdm</i> - <i>sra</i>                  | <i>bdm</i>   | < |     | > | <i>osm</i> C  | <i>osm</i> C                                           | osmotically inducible membrane             |
| 2E+06    | pyridine nucleotide transhydrogenase     | <i>pnt</i> AB                            | <i>pnt</i> A | < |     | > | <i>ydg</i> H  | <i>ydg</i> H                                           | predicted protein                          |
| 2E+06    | transcription factor                     | <i>sly</i> A                             | <i>sly</i> A | < |     | > | <i>ydh</i> I  | <i>ydh</i> IJK                                         | predicted IM protein                       |
| 2E+06    | conserved protein                        | <i>grxD</i>                              | <i>grxD</i>  | < |     | > | <i>ydh</i> O  | <i>ydh</i> O                                           | predicted lipoprotein                      |
| 2E+06    | conserved protein                        | <i>ydh</i> Q                             | <i>ydh</i> Q | < |     | > | <i>val</i> V  | <i>val</i> VW                                          | Val tRNA                                   |
| 2E+06    | phosphoenolpyruvate synthase             | <i>pps</i> A                             | <i>pps</i> A | < |     | > | <i>pps</i> R  | <i>pps</i> R                                           | PEP synthetase regulatory protein          |
| 2E+06    | succinylornithine transaminase           | <i>ast</i> CADBE                         | <i>ast</i> C | < |     | > | <i>xth</i> A  | <i>xth</i> A                                           | exonuclease III                            |
| 2E+06    | KpLE2 IS1 repressor InsA                 | <i>ins</i> A                             | <i>ins</i> A | < |     | > | <i>usp</i> C  | <i>usp</i> C                                           | universal stress protein                   |
| 2E+06    | L-arabinose transporter                  | <i>ara</i> FGH                           | <i>ara</i> F | < |     | > | <i>ftn</i> B  | <i>ftn</i> B                                           | predicted ferritin-like protein            |
| 2E+06    | predicted protein                        | <i>yec</i> H                             | <i>yec</i> H | < |     | > | <i>tyr</i> P  | <i>tyr</i> P                                           | tyrosine transporter                       |
| 2E+06    | YedVW TCS response regulator             | <i>yed</i> WV                            | <i>yed</i> W | < |     | > | <i>yed</i> X  | <i>yed</i> X                                           | conserved protein                          |
| 2E+06    | IS5 transposase and trans-activator      | <i>ins</i> H                             | <i>ins</i> H | < |     | > | <i>yoe</i> A  | <i>yoe</i> A                                           | CP4-44 hemin or colicin receptor           |
| 2E+06    | predicted protein                        | <i>yeg</i> RZ                            | <i>yeg</i> R | < |     | > | <i>yeg</i> S  | <i>yeg</i> S                                           | phosphatidylglycerol kinase                |
| 2E+06    | beta-D-glucoside glucohydrolase          | <i>bgl</i> X                             | <i>bgl</i> X | < |     | > | <i>dld</i>    | <i>dld</i>                                             | D-lactate dehydrogenase                    |
| 2E+06    | ferredoxin-type protein                  | <i>nap</i> FDAGHB C- <i>ccm</i> ABCDEF   | <i>nap</i> F | < |     | > | <i>yoj</i> O  | <i>yoj</i> O                                           | hypothetical protein                       |
| 2E+06    | conserved protein                        | <i>ais</i>                               | <i>ais</i>   | < |     | > | <i>arn</i> B  | <i>arn</i> BCADTEF                                     | UDP-Ara4O aminotransferase                 |
| 2E+06    | transcription factor                     | <i>lrh</i> A                             | <i>lrh</i> A | < |     | > | <i>ala</i> A  | <i>ala</i> A                                           | glutamate-pyruvate aminotransferase        |
| 2E+06    | conserved protein                        | <i>yfc</i> Z                             | <i>yfc</i> Z | < |     | > | <i>fad</i> L  | <i>fad</i> L                                           | long-chain fatty acid OM transporter       |
| 3E+06    | purine nucleoside phosphorylase II       | <i>xap</i> AB                            | <i>xap</i> A | < |     | > | <i>yfe</i> N  | <i>yfe</i> N                                           | conserved OM protein                       |
| 3E+06    | predicted oxidoreductase                 | <i>aeg</i> A                             | <i>aeg</i> A | < |     | > | <i>nar</i> Q  | <i>nar</i> Q                                           | NarQP(L) TCS sensor kinase                 |
| 3E+06    | ile tRNA                                 | <i>ile</i> Y                             | <i>ile</i> Y | < |     | > | <i>yqa</i> Q  | <i>yqa</i> Q                                           | predicted protein                          |
| 3E+06    | nucleoid-associated transcription factor | <i>stp</i> A                             | <i>stp</i> A | < |     | > | <i>yga</i> W  | <i>yga</i> W                                           | predicted IM protein                       |
| 3E+06    | HD nuclease-DEAD box helicase            | <i>cas</i> 3                             | <i>cas</i> 3 | < |     | > | <i>sok</i> X  | <i>sok</i> X                                           | sok-related sRNA                           |
| 3E+06    | N-acetylmuramoyl-L-alanine amidase       | <i>ami</i> C                             | <i>ami</i> C | < |     | > | <i>arg</i> A  | <i>arg</i> A                                           | N-acetylglutamate synthase                 |
| 3E+06    | predicted acyltransferase                | <i>yqe</i> F                             | <i>yqe</i> F | < |     | > | <i>yqe</i> G  | <i>yqe</i> G                                           | predicted transporter                      |
| 3E+06    | predicted protein                        | <i>yqe</i> K                             | <i>yqe</i> K | < |     | > | <i>yqe</i> G  | <i>yqe</i> G                                           | predicted chaperone                        |
| 3E+06    | predicted IM protein                     | <i>yqq</i> D                             | <i>yqq</i> D | < |     | > | <i>met</i> K  | <i>met</i> K                                           | methionine adenosyltransferase 1           |
| 3E+06    | conserved protein                        | <i>yqi</i> W                             | <i>yqi</i> W | < |     | > | <i>qse</i> B  | <i>qse</i> BC                                          | QseBC TCS response regulator               |
| 3E+06    | methyl-accepting aerotaxis sensor        | <i>aer</i>                               | <i>aer</i>   | < |     | > | <i>pat</i> A  | <i>pat</i> A                                           | putrescine aminotransferase                |
| 3E+06    | transcription factor                     | <i>tdc</i> ABCDEFG                       | <i>tdc</i> A | < |     | > | <i>tdc</i> R  | <i>tdc</i> R                                           | transcription factor                       |
| 3E+06    | predicted Fe-S oxidoreductase            | <i>yhc</i> C                             | <i>yhc</i> C | < |     | > | <i>glt</i> B  | <i>glt</i> BDF                                         | glutamate synthase                         |
| 3E+06    | transcription factor                     | <i>nan</i> R                             | <i>nan</i> R | < |     | > | <i>dcu</i> D  | <i>dcu</i> D                                           | predicted transporter                      |
| 3E+06    | transcription factor                     | <i>env</i> R                             | <i>env</i> R | < |     | > | <i>acr</i> E  | <i>acr</i> EF                                          | cytoplasmic membrane lipoprotein           |
| 3E+06    | peptidyl-prolyl cis-trans isomerase      | <i>fkp</i> A                             | <i>fkp</i> A | < |     | > | <i>sly</i> X  | <i>sly</i> X                                           | conserved protein                          |
| 4E+06    | predicted inner membrane protein         | <i>yhg</i> E                             | <i>yhg</i> E | < |     | > | <i>pck</i>    | <i>pck</i>                                             | phosphoenolpyruvate carboxykinase          |
| 4E+06    | leucine transporter                      | <i>liv</i> KHMGF                         | <i>liv</i> K | < |     | > | <i>yhh</i> K  | <i>yhh</i> K                                           | conserved protein                          |
| 4E+06    | predicted protein                        | <i>yhi</i> L                             | <i>yhi</i> L | < |     | > | <i>yhi</i> M  | <i>yhi</i> M                                           | conserved IM protein                       |
| 4E+06    | IS5 transposase and trans-activator      | <i>ins</i> H                             | <i>ins</i> H | < |     | > | <i>slp</i>    | <i>slp</i> - <i>dct</i> R                              | OM lipoprotein                             |
| 4E+06    | <i>qed</i> VW TCS response regulator     | <i>gad</i> W                             | <i>gad</i> W | < |     | > | <i>gad</i> Y  | <i>gad</i> Y                                           | ncRNA                                      |
| 4E+06    | conserved protein                        | <i>yhi</i> R                             | <i>yhi</i> R | < |     | > | <i>bcs</i> E  | <i>bcs</i> EFG                                         | conserved protein                          |
| 4E+06    | D-xylose isomerase                       | <i>xyl</i> AB                            | <i>xyl</i> A | < |     | > | <i>xyl</i> F  | <i>xyl</i> FGHR                                        | D-xylose transporter                       |
| 4E+06    | conserved protein                        | <i>bax</i>                               | <i>bax</i>   | < |     | > | <i>mal</i> S  | <i>mal</i> S                                           | alpha-amylase                              |
| 4E+06    | glutamate transporter                    | <i>glt</i> S                             | <i>glt</i> S | < |     | > | <i>xan</i> P  | <i>xan</i> P                                           | xanthine NCS2 transporter                  |
| 4E+06    | predicted transcription factor           | <i>yie</i> P- <i>hsr</i> A               | <i>yie</i> P | < |     | > | <i>rrs</i> C  | <i>rrs</i> C- <i>glt</i> U- <i>rrl</i> C- <i>rrf</i> C | 16S rRNA                                   |
| 4E+06    | predicted endonuclease                   | <i>yih</i> G                             | <i>yih</i> G | < |     | > | <i>pol</i> A  | <i>pol</i> A                                           | DNA polymerase I                           |
| 4E+06    | GTP-binding protein                      | <i>yih</i> A                             | <i>yih</i> A | < |     | > | <i>csr</i> C  | <i>csr</i> C                                           | ncRNA                                      |
| 4E+06    | pyridine nucleotide transhydrogenase     | <i>sth</i> A                             | <i>sth</i> A | < |     | > | <i>fab</i> R  | <i>fab</i> R- <i>yij</i> D                             | transcription factor                       |
| 4E+06    | hypothetical protein                     | <i>yib</i> S                             | <i>yib</i> S | < |     | > | <i>aph</i> A  | <i>aph</i> A                                           | acid phosphatase/phosphotransferase        |
| 4E+06    | aspartate ammonia-lyase                  | <i>asp</i> A- <i>dcu</i> A               | <i>asp</i> A | < |     | > | <i>fxs</i> A  | <i>fxs</i> A                                           | IM protein                                 |
| 4E+06    | anaerobic fumarate reductase             | <i>frd</i> ABCD                          | <i>frd</i> A | < |     | > | <i>pox</i> A  | <i>pox</i> A                                           | predicted lysyl-tRNA synthetase            |
| 4E+06    | predicted transcriptional factor         | <i>ytf</i> J                             | <i>ytf</i> J | < |     | > | <i>ytf</i> K  | <i>ytf</i> K                                           | conserved protein                          |
| 4E+06    | methionine sulfoxide reductase A         | <i>msr</i> A                             | <i>msr</i> A | < |     | > | <i>ytf</i> M  | <i>ytf</i> MNP                                         | OM protein surface antigen                 |
| 5E+06    | KpLE2 IS4 transposase                    | <i>ins</i> G                             | <i>ins</i> G | < |     | > | <i>yjh</i> B  | <i>yjh</i> BC                                          | KpLE2 phage transporter                    |
| 5E+06    | predicted protein                        | <i>yji</i> C                             | <i>yji</i> C | < |     | > | <i>ira</i> D  | <i>ira</i> D                                           | RpoS proteolysis inhibitor                 |
| 5E+06    | nucleoid-associated transcription factor | <i>rob</i>                               | <i>rob</i>   | < |     | > | <i>cre</i> A  | <i>cre</i> ABCD                                        | conserved protein                          |

Total, 78 peaks (target operons, 156)

**Type-B spacers**

| Position | Function        | Operon | Gene         | D | Lrp | D | Gene       | Operon     | Function                   |
|----------|-----------------|--------|--------------|---|-----|---|------------|------------|----------------------------|
| 9262     | transaldolase B |        | <i>tal</i> B | > |     | > | <i>mog</i> | <i>mog</i> | predicted molybdochelatase |

|        |                                                                                                     |                                   |             |   |   |             |                            |                                           |
|--------|-----------------------------------------------------------------------------------------------------|-----------------------------------|-------------|---|---|-------------|----------------------------|-------------------------------------------|
| 85536  | transcriptional factor                                                                              |                                   | <b>leuO</b> | > | > | <b>ilvI</b> | <i>ilvIH</i>               | acetolactate synthase III                 |
| 152844 | predicted fimbrial-like adhesin protein                                                             | <i>yadMLKC</i>                    | <b>yadM</b> | < | < | <b>htrE</b> |                            | predicted OM usher protein                |
| 155442 | predicted OM usher protein                                                                          | <i>htrE</i>                       | <b>htrE</b> | < | < | <b>ecpD</b> |                            | predicted periplasmic pilin chaperone     |
| 236848 | DNA polymerase III                                                                                  |                                   | <b>dnaQ</b> | > | > | <b>aspV</b> |                            | Asp tRNA                                  |
| 251970 | DNA polymerase IV                                                                                   |                                   | <b>dinB</b> | > | > | <b>yafN</b> | <i>yafNOP</i>              | YafO-YafN toxin-antitoxin                 |
| 317836 | predicted protein                                                                                   | <i>ykgIB</i>                      | <b>ykgI</b> | < | < | <b>ykgC</b> |                            | predicted oxidoreductase                  |
| 320346 | transcription factor                                                                                |                                   | <b>ykgD</b> | > | > | <b>ykgE</b> | <i>ykgEFG</i>              | predicted oxidoreductase                  |
| 389160 | porphobilinogen synthase                                                                            | <i>hemB</i>                       | <b>hemB</b> | < | < | <b>insF</b> |                            | IS3 element protein InsF                  |
| 418534 | PhoBR TCS sensor kinase                                                                             |                                   | <b>phoR</b> | > | > | <b>brnQ</b> | <i>brnQ-proY</i>           | branched amino acid transporter           |
| 433872 | diaminohydroxyphosphoribosylaminopyrimidine deaminase-amino-(5-phosphoribosylamino)uracil reductase |                                   | <b>ribD</b> | > | > | <b>ribE</b> | <i>ribE-nusB-thiL-pgpA</i> | riboflavin synthase beta chain            |
| 467530 | thiamin pyrimidine pyrophosphate hydrolase                                                          |                                   | <b>cof</b>  | > | > | <b>ybaO</b> | <i>ybaO</i>                | predicted transcription factor            |
| 479234 | maltose O-acetyltransferase                                                                         | <i>maa</i>                        | <b>maa</b>  | < | < | <b>hha</b>  |                            | H-NS regulator                            |
| 530448 | tRNA 2-selenouridine synthase                                                                       | <i>ybbB</i>                       | <b>ybbB</b> | < | < | <b>allS</b> |                            | transcription factor                      |
| 536860 | tartronate semialdehyde reductase                                                                   |                                   | <b>glxR</b> | > | > | <b>ybbW</b> | <i>ybbW-allB-ybbY-glxK</i> | predicted allantoin transporter           |
| 567532 | IS3 element protein InsF                                                                            |                                   | <b>insF</b> | > | > | <b>emrE</b> | <i>emrE</i>                | DLP12 multidrug resistance protein        |
| 569664 | DLP12 prophage recombinase                                                                          |                                   | <b>ybcK</b> | > | > | <b>ybcL</b> | <i>ybcLM</i>               | DLP12 kinase inhibitor                    |
| 603938 | mechanosensitive channel                                                                            | <i>mscM</i>                       | <b>mscM</b> | < | < | <b>nfsB</b> |                            | dihydropteridine reductase                |
| 659532 | lipate synthase                                                                                     | <i>lipA</i>                       | <b>lipA</b> | < | < | <b>ybeF</b> |                            | predicted transcription factor            |
| 696540 | Met tRNA                                                                                            | <i>metT-leuW-glnUW-metU-glnVX</i> | <b>metT</b> | < | < | <b>asnB</b> |                            | asparagine synthetase B                   |
| 735642 | predicted protein                                                                                   |                                   | <b>ybfC</b> | > | > | <b>ybfQ</b> | <i>ybfQ</i>                | predicted transposase                     |
| 736068 | predicted transposase                                                                               |                                   | <b>ybfQ</b> | > | > | <b>ybfL</b> | <i>ybfL</i>                | predicted transposase                     |
| 802538 | predicted transporter                                                                               |                                   | <b>ybhI</b> | > | > | <b>ybhJ</b> | <i>ybhJ</i>                | predicted hydratase                       |
| 837438 | predicted protein                                                                                   | <i>ybiJ</i>                       | <b>ybiJ</b> | < | < | <b>ybil</b> |                            | conserved protein                         |
| 892742 | predicted oxidoreductase                                                                            |                                   | <b>ybiN</b> | > | > | <b>potF</b> | <i>potFGHI</i>             | putrescine transporter                    |
| 903170 | arginine transporter                                                                                | <i>artPIQM</i>                    | <b>artP</b> | < | < | <b>ybiP</b> |                            | predicted lipoprotein                     |
| 936430 | chromosome resolution and recombination protein                                                     |                                   | <b>ftsK</b> | > | > | <b>lolA</b> | <i>lolA-rarA</i>           | chaperone for lipoproteins                |
| 938542 | recombination protein                                                                               |                                   | <b>rarA</b> | > | > | <b>serS</b> | <i>serS</i>                | seryl-tRNA synthetase                     |
| 946370 | predicted transporter                                                                               |                                   | <b>ycaD</b> | > | > | <b>ycaM</b> | <i>ycaM</i>                | predicted transporter                     |
| 956734 | conserved inner membrane protein                                                                    |                                   | <b>ycaP</b> | > | > | <b>serC</b> | <i>serC-aroA</i>           | phosphohydroxythreonine aminotransferase  |
| 985134 | aspartate aminotransferase                                                                          | <i>aspC</i>                       | <b>aspC</b> | < | < | <b>ompF</b> |                            | OM porin 1a                               |
| 986550 | OM porin 1a                                                                                         | <i>ompF</i>                       | <b>ompF</b> | < | < | <b>asnS</b> |                            | asparaginyl tRNA synthetase               |
| 1E+06  | DNA-binding protein                                                                                 | <i>hspQ</i>                       | <b>hspQ</b> | < | < | <b>yccW</b> |                            | predicted methyltransferase               |
| 1E+06  | conserved protein                                                                                   |                                   | <b>efeB</b> | > | > | <b>phoH</b> | <i>phoH</i>                | nucleoside triphosphate hydrolase         |
| 1E+06  | predicted protein                                                                                   | <i>bssS</i>                       | <b>bssS</b> | < | < | <b>dinI</b> |                            | DNA damage-inducible protein I            |
| 1E+06  | predicted lipoprotein                                                                               | <i>yceB</i>                       | <b>yceB</b> | < | < | <b>grxB</b> |                            | glutaredoxin 2                            |
| 1E+06  | e14 prophage methyltransferase                                                                      | <i>ymlD</i>                       | <b>ymlD</b> | < | < | <b>ymlE</b> |                            | e14 prophage IM protein                   |
| 1E+06  | RpoS proteolysis inhibitor                                                                          | <i>iraM</i>                       | <b>iraM</b> | < | < | <b>ycgX</b> |                            | predicted protein                         |
| 1E+06  | predicted transcription factor                                                                      | <i>ycaE</i>                       | <b>ycgE</b> | < | < | <b>ycqF</b> |                            | FAD-binding phosphodiesterase             |
| 1E+06  | conserved IM protein                                                                                |                                   | <b>ycgG</b> | > | > | <b>ymgF</b> | <i>ymgF</i>                | predicted protein                         |
| 1E+06  | predicted adhesin                                                                                   | <i>ycqV</i>                       | <b>ycqV</b> | < | < | <b>ychF</b> |                            | predicted GTP-binding protein             |
| 1E+06  | predicted transcription factor                                                                      |                                   | <b>ycaA</b> | > | > | <b>kdsA</b> | <i>kdsA</i>                | D-manno-octulosonate 8-phosphate synthase |
| 1E+06  | nitrate/nitrite transporter                                                                         |                                   | <b>narK</b> | > | > | <b>narG</b> | <i>narGHJ</i>              | nitrate reductase 1                       |
| 1E+06  | predicted IM protein                                                                                |                                   | <b>ychE</b> | > | > | <b>oppA</b> | <i>oppABCDF</i>            | oligopeptide transporter                  |
| 1E+06  | predicted IM protein                                                                                |                                   | <b>yciQ</b> | > | > | <b>rluB</b> | <i>rluB</i>                | 23S rRNA pseudouridylate synthase         |
| 1E+06  | DNA topoisomerase II                                                                                |                                   | <b>topA</b> | > | > | <b>cysB</b> | <i>cysB</i>                | transcription factor                      |
| 1E+06  | transcription factor                                                                                |                                   | <b>cysB</b> | > | > | <b>ymlA</b> | <i>ymlA-yciX</i>           | hypothetical protein                      |
| 1E+06  | hypothetical protein                                                                                | <i>yciZT</i>                      | <b>yciZ</b> | < | < | <b>gmr</b>  |                            | RNase II modulator                        |
| 1E+06  | RNase II stability modulator                                                                        | <i>gmr</i>                        | <b>gmr</b>  | < | < | <b>rrb</b>  |                            | ribonuclease II                           |
| 1E+06  | conserved IM protein                                                                                |                                   | <b>yciF</b> | > | > | <b>tyrR</b> | <i>tyrR</i>                | transcription factor                      |
| 1E+06  | Rac prophage site-specific                                                                          | <i>pinR</i>                       | <b>pinR</b> | < | < | <b>ynaE</b> |                            | Rac transcription factor                  |
| 2E+06  | SAM-dependent methyltransferase                                                                     |                                   | <b>tehB</b> | > | > | <b>ydcL</b> | <i>ydcL</i>                | predicted lipoprotein                     |
| 2E+06  | nitrate/nitrite transporter                                                                         | <i>narU</i>                       | <b>narU</b> | < | < | <b>yddJ</b> |                            | predicted protein                         |
| 2E+06  | predicted protein                                                                                   | <i>yddJ</i>                       | <b>yddJ</b> | < | < | <b>yddG</b> |                            | methyl viologen efflux pump               |
| 2E+06  | diguanylate cyclase                                                                                 | <i>dosCP</i>                      | <b>dosC</b> | < | < | <b>yddW</b> |                            | predicted lipoprotein                     |
| 2E+06  | glutamate decarboxylase B                                                                           | <i>gadBC</i>                      | <b>gadB</b> | < | < | <b>pqqL</b> |                            | predicted peptidase                       |
| 2E+06  | conserved protein                                                                                   | <i>ydeN</i>                       | <b>ydeN</b> | < | < | <b>ydeO</b> |                            | transcription factor                      |
| 2E+06  | predicted lipoprotein                                                                               | <i>ydeK</i>                       | <b>ydeK</b> | < | < | <b>IsrK</b> |                            | autoinducer-2 (AI-2) kinase               |
| 2E+06  | predicted diguanylate cyclase                                                                       | <i>yneF</i>                       | <b>yneF</b> | < | < | <b>yneG</b> |                            | conserved protein                         |
| 2E+06  | conserved protein                                                                                   | <i>ydeH</i>                       | <b>ydeH</b> | < | < | <b>ydel</b> |                            | conserved protein                         |
| 2E+06  | Qin prophage transcription factor                                                                   |                                   | <b>ydkK</b> | > | > | <b>pinQ</b> | <i>pinQ</i>                | Qin site-specific recombinase             |
| 2E+06  | predicted protein                                                                                   |                                   | <b>vdqH</b> | > | > | <b>ydqI</b> | <i>vdqI-foIM</i>           | arginine/ornithine antiporter transporter |
| 2E+06  | DNA glycosylase-endonuclease III                                                                    |                                   | <b>nth</b>  | > | > | <b>tpdB</b> | <i>tpdB</i>                | predicted transporter                     |
| 2E+06  | conserved protein                                                                                   | <i>ydiV</i>                       | <b>ydiV</b> | < | < | <b>nlpC</b> |                            | predicted lipoprotein                     |
| 2E+06  | predicted diguanylate cyclase                                                                       |                                   | <b>yeal</b> | > | > | <b>yeaJ</b> | <i>yeaJ</i>                | predicted diguanylate cyclase             |
| 2E+06  | neutral amino-acid efflux system                                                                    | <i>leuE</i>                       | <b>leuE</b> | < | < | <b>yeaT</b> |                            | transcription factor                      |
| 2E+06  | predicted NUDIX hydrolase                                                                           |                                   | <b>nudL</b> | > | > | <b>sdaA</b> | <i>sdaA</i>                | L-serine deaminase I                      |
| 2E+06  | ncRNA                                                                                               |                                   | <b>rseX</b> | > | > | <b>hchA</b> | <i>hchA</i>                | Hsp31 molecular chaperone                 |
| 2E+06  | AMP nucleosidase                                                                                    |                                   | <b>amn</b>  | > | > | <b>yeeN</b> | <i>yeeN</i>                | conserved protein                         |
| 2E+06  | cobinamide kinase                                                                                   | <i>cobUST</i>                     | <b>cobU</b> | < | < | <b>insH</b> |                            | IS5 transposase and trans-activator       |
| 2E+06  | predicted IM protein                                                                                | <i>yeeED</i>                      | <b>yeeE</b> | < | < | <b>yeeF</b> |                            | predicted amino-acid transporter          |
| 2E+06  | predicted peptidase                                                                                 |                                   | <b>yegQ</b> | > | > | <b>cyaR</b> | <i>cyaR</i>                | ncRNA                                     |
| 2E+06  | galactitol-specific PTS IIA                                                                         | <i>gatABCD</i>                    | <b>gatA</b> | < | < | <b>gatZ</b> |                            | D-tagatose 1,6-bisphosphate aldolase      |
| 2E+06  | predicted protein                                                                                   |                                   | <b>yehK</b> | > | > | <b>yehL</b> | <i>yehLMPQ</i>             | predicted transporter subunit             |
| 2E+06  | conserved protein                                                                                   | <i>yehS</i>                       | <b>yehS</b> | < | < | <b>yehT</b> |                            | YehUT TCS response regulator              |
| 2E+06  | predicted IM protein                                                                                |                                   | <b>yehS</b> | > | > | <b>yehT</b> |                            | YehUT TCS response regulator              |
| 2E+06  | predicted IM protein                                                                                |                                   | <b>yehS</b> | > | > | <b>yehT</b> |                            | YehUT TCS response regulator              |
| 2E+06  | endonuclease IV                                                                                     |                                   | <b>nfo</b>  | > | > | <b>yehI</b> | <i>yehI</i>                | Dihydropyrimidine dehydrogenase           |
| 2E+06  | undecaprenyl pyrophosphate                                                                          |                                   | <b>lpxT</b> | > | > | <b>spr</b>  | <i>spr</i>                 | predicted peptidase                       |
| 2E+06  | hypothetical protein                                                                                |                                   | <b>yoiO</b> | > | > | <b>eco</b>  | <i>eco</i>                 | serine protease inhibitor ecptin          |
| 2E+06  | ncRNA                                                                                               |                                   | <b>micF</b> | > | > | <b>rcsD</b> | <i>rcsDB</i>               | RcsBC TCS phospho transfer                |
| 2E+06  | predicted protein                                                                                   | <i>yfaQP</i>                      | <b>yfaQ</b> | < | < | <b>yfaT</b> |                            | predicted protein                         |
| 2E+06  | NADH:ubiquinone oxidoreductase                                                                      | <i>nuoABCEFGHIJKLMN</i>           | <b>nuoA</b> | < | < | <b>lrhA</b> |                            | transcription factor                      |
| 2E+06  | phosphate acetyltransferase                                                                         |                                   | <b>pta</b>  | > | > | <b>yfcC</b> | <i>yfcC</i>                | predicted IM protein                      |
| 3E+06  | predicted peptidase                                                                                 |                                   | <b>yfhR</b> | > | > | <b>csiE</b> | <i>csiE</i>                | stationary phase inducible protein        |
| 3E+06  | 16S rRNA                                                                                            | <i>rrsG-gltW-rrlG-rrfG</i>        | <b>rrsG</b> | < | < | <b>clpB</b> |                            | protein disaggregation chaperone          |
| 3E+06  | cold shock protein                                                                                  |                                   | <b>raiA</b> | > | > | <b>pheL</b> | <i>pheLA</i>               | <i>pheA</i> gene leader peptide           |

|       |                                            |                                       |             |   |   |             |                           |                                        |
|-------|--------------------------------------------|---------------------------------------|-------------|---|---|-------------|---------------------------|----------------------------------------|
| 3E+06 | ribonucleoside-diphosphate reductase       |                                       | <i>nrdF</i> | > | > | <i>proV</i> | <i>proVWX</i>             | glycine betaine transporter            |
| 3E+06 | cascade subunit A                          | <i>casABCDE12</i>                     | <i>casA</i> | < | < | <i>cas3</i> |                           | HD nuclease-DEAD box helicase          |
| 3E+06 | predicted D-glucarate transporter          | <i>gudPXD</i>                         | <i>gudP</i> | < | < | <i>yqcA</i> |                           | predicted flavoprotein                 |
| 3E+06 | conserved protein                          |                                       | <i>ygdH</i> | > | > | <i>sdaC</i> | <i>sdaCB</i>              | predicted serine transporter           |
| 3E+06 | predicted chaperone                        |                                       | <i>ygeG</i> | > | > | <i>ygeH</i> | <i>ygeH</i>               | transcription factor                   |
| 3E+06 | predicted transporter                      |                                       | <i>ygfO</i> | > | > | <i>quaD</i> | <i>quaD-ygfQ</i>          | guanine deaminase                      |
| 3E+06 | aminomethyltransferase                     | <i>gcvTHP</i>                         | <i>gcvT</i> | < | < | <i>visC</i> |                           | predicted oxidoreductase               |
| 3E+06 | D-3-phosphoglycerate dehydrogenase         | <i>serA</i>                           | <i>serA</i> | < | < | <i>rpiA</i> |                           | ribose 5-phosphate isomerase           |
| 3E+06 | periplasmic L-asparaginase II              | <i>ansB</i>                           | <i>ansB</i> | < | < | <i>yggN</i> |                           | predicted protein                      |
| 3E+06 | predicted IM lipoprotein                   | <i>yghJ</i>                           | <i>yghJ</i> | < | < | <i>glcA</i> |                           | glycolate transporter                  |
| 3E+06 | glycolate transporter                      | <i>glcA</i>                           | <i>glcA</i> | < | < | <i>glcB</i> |                           | malate synthase G                      |
| 3E+06 | phosphate transporter                      | <i>pitB</i>                           | <i>pitB</i> | < | < | <i>gsp</i>  |                           | glutathionylspermidine synthetase      |
| 3E+06 | conserved protein                          |                                       | <i>yqiC</i> | > | > | <i>yqiL</i> | <i>yqiL</i>               | predicted fimbrial-like adhesin        |
| 3E+06 | transcription factor                       |                                       | <i>tdcR</i> | > | > | <i>yhaB</i> | <i>yhaBC</i>              | predicted protein                      |
| 3E+06 | glutamate synthase, 4Fe-4S protein         |                                       | <i>gltD</i> | > | > | <i>gltF</i> | <i>gltF</i>               | periplasmic protein                    |
| 3E+06 | transcription factor                       |                                       | <i>argR</i> | > | > | <i>yhcN</i> | <i>yhcN</i>               | conserved protein                      |
| 3E+06 | predicted OM protein                       |                                       | <i>yhdV</i> | > | > | <i>yhdW</i> | <i>yhdWXYZ</i>            | YhdW                                   |
| 3E+06 | conserved protein                          | <i>yhdN-zntR</i>                      | <i>yhdN</i> | < | < | <i>rplQ</i> |                           | 50S ribosomal subunit protein L17      |
| 3E+06 | 50S ribosome protein L6                    | <i>rplFR-rpsE-rpmD-rplO-secY-rpmJ</i> | <i>rplF</i> | < | < | <i>rpsH</i> |                           | 30S ribosomal subunit protein S8       |
| 4E+06 | conserved protein                          |                                       | <i>yhhZ</i> | > | > | <i>yrhA</i> | <i>yrhA-insA-6AB-6B-6</i> | conserved protein                      |
| 4E+06 | leucine/isoleucine/valine transporter      | <i>livJ</i>                           | <i>livJ</i> | < | < | <i>rpoH</i> |                           | RNA polymerase RpoH sigma              |
| 4E+06 | predicted protein                          |                                       | <i>yhhH</i> | > | > | <i>yhhI</i> | <i>yhhI</i>               | predicted transposase                  |
| 4E+06 | universal stress protein                   |                                       | <i>uspA</i> | > | > | <i>dtpB</i> | <i>dtpB</i>               | predicted transporter                  |
| 4E+06 | arsenate reductase                         |                                       | <i>arsC</i> | > | > | <i>yhiS</i> | <i>yhiS</i>               | predicted protein                      |
| 4E+06 | conserved IM protein                       |                                       | <i>yhiD</i> | > | > | <i>yhiE</i> | <i>yhiE</i>               | predicted transporter                  |
| 4E+06 | predicted OM biogenesis protein            | <i>yhiG</i>                           | <i>yhiG</i> | < | < | <i>yhiH</i> |                           | flagellar function EAL regulator       |
| 4E+06 | dipeptide transporter                      | <i>dppABCDF</i>                       | <i>dppA</i> | < | < | <i>proK</i> |                           | Pro tRNA                               |
| 4E+06 | alpha-amylase                              |                                       | <i>malS</i> | > | > | <i>avtA</i> | <i>avtA</i>               | valine-pyruvate aminotransferase       |
| 4E+06 | conserved IM protein                       | <i>yiaWV</i>                          | <i>yiaW</i> | < | < | <i>aldB</i> |                           | aldehyde dehydrogenase B               |
| 4E+06 | Fe-containing alcohol dehydrogenase        | <i>viaY</i>                           | <i>viaY</i> | < | < | <i>selB</i> |                           | selecnOCys-tRNA translation factor     |
| 4E+06 | glycine C-acetyltransferase                | <i>kbl-tdh</i>                        | <i>kbl</i>  | > | > | <i>htrL</i> |                           | predicted protein                      |
| 4E+06 | LPS heptosyl transferase I                 |                                       | <i>rfaC</i> | > | > | <i>rfaL</i> | <i>rfaL</i>               | O-antigen ligase                       |
| 4E+06 | lexA-regulated toxic peptide               |                                       | <i>tisB</i> | > | > | <i>emrD</i> | <i>emrD</i>               | multidrug efflux system protein        |
| 4E+06 | GTPase                                     |                                       | <i>mnmE</i> | > | > | <i>tnaC</i> | <i>tnaCAB</i>             | tryptophanase leader peptide           |
| 4E+06 | tryptophanase leader peptide               |                                       | <i>tnaC</i> | > | > | <i>tnaA</i> | <i>tnaAB</i>              | tryptophanase/cysteine desulfhydrase   |
| 4E+06 | glucosamine-1-phosphate acetyl transferase | <i>glmUS</i>                          | <i>glmU</i> | < | < | <i>atpC</i> |                           | F1 membrane-bound ATP synthase         |
| 4E+06 | disulfide isomerase I                      |                                       | <i>dsbA</i> | > | > | <i>yihF</i> | <i>yihF</i>               | conserved protein                      |
| 4E+06 | predicted acetyltransferase                |                                       | <i>yiiD</i> | > | > | <i>yiiE</i> | <i>yiiE</i>               | predicted transcriptional regulator    |
| 4E+06 | homoserine O-transsuccinylase              |                                       | <i>metA</i> | > | > | <i>aceB</i> | <i>aceBAK</i>             | malate synthase A                      |
| 4E+06 | ankyrin repeat protein                     | <i>arpA</i>                           | <i>arpA</i> | < | < | <i>iclR</i> |                           | DNA-binding transcriptional repressor  |
| 4E+06 | SOS response protein                       |                                       | <i>dinF</i> | > | > | <i>yjbJ</i> | <i>yjbJ</i>               | predicted stress response protein      |
| 4E+06 | heme lyase                                 |                                       | <i>nrfG</i> | > | > | <i>gltP</i> | <i>gltP</i>               | glutamate/aspartate:proton symporter   |
| 4E+06 | predicted alkyl sulfatase                  | <i>yicS</i>                           | <i>yicS</i> | < | < | <i>alsK</i> |                           | D-allose kinase                        |
| 4E+06 | transcription factor                       | <i>adiY</i>                           | <i>adiY</i> | < | < | <i>adiA</i> |                           | biodegradative arginine decarboxylase  |
| 4E+06 | C4-dicarboxylate antiporter                | <i>dcuB-fumB</i>                      | <i>dcuB</i> | < | < | <i>dcuR</i> |                           | DcuSR TCS response regulator           |
| 4E+06 | lysine tRNA synthetase, inducible          | <i>lysU</i>                           | <i>lysU</i> | < | < | <i>yjdL</i> |                           | predicted transporter                  |
| 4E+06 | predicted lysine/cadaverine transporter    | <i>cadBA</i>                          | <i>cadB</i> | < | < | <i>cadC</i> |                           | DNA-binding transcriptional activator  |
| 4E+06 | predicted lysyl-tRNA synthetase            |                                       | <i>poxA</i> | > | > | <i>yjeM</i> | <i>yjeM</i>               | predicted transporter                  |
| 4E+06 | conserved protein                          |                                       | <i>yjiM</i> | > | > | <i>yifC</i> | <i>yifC</i>               | predicted synthetase/amidase           |
| 4E+06 | peptidyl-prolyl cis-trans isomerase        |                                       | <i>fkfB</i> | > | > | <i>cycA</i> | <i>cycA</i>               | D-alanine/D-serine/glycine transporter |
| 4E+06 | KpLE2 IS2 insertion transposase            |                                       | <i>insD</i> | > | > | <i>yiqW</i> | <i>yiqW</i>               | KpLE2 phage-like element               |
| 5E+06 | KpLE2 transcription factor                 | <i>yjhIHG</i>                         | <i>yjhI</i> | < | < | <i>sgcR</i> |                           | KpLE2 transcription factor             |
| 5E+06 | <i>fimA</i> switch tyrosine recombinase    |                                       | <i>fimE</i> | > | > | <i>fimA</i> | <i>fimAICDFGH</i>         | major type 1 subunit fimbria (pilin)   |
| 5E+06 | peptide chain release factor RF-3          |                                       | <i>prfC</i> | > | > | <i>osmY</i> | <i>osmY</i>               | periplasmic protein                    |

Total 140 peaks (target operons, 140)

#### Type-C spacers

| Position | Function                        | Operon | Gene        | D | Lrp | D | Gene        | Operon | Function                        |
|----------|---------------------------------|--------|-------------|---|-----|---|-------------|--------|---------------------------------|
| 238230   | predicted aminopeptidase        |        | <i>yafT</i> | > | <   | < | <i>ykfM</i> |        | hypothetical protein            |
| 583650   | DLP12 transcriptional activator |        | <i>appY</i> | > | <   | < | <i>ompT</i> |        | DLP12 OM protease VII           |
| 1E+06    | cation transport regulator      |        | <i>chaC</i> | > | <   | < | <i>ychn</i> |        | conserved protein               |
| 1E+06    | IM phosphatase                  |        | <i>yhbD</i> | > | <   | < | <i>azoR</i> |        | NADH-azoreductase               |
| 3E+06    | RNA-binding protein             |        | <i>yhbY</i> | > | <   | < | <i>greA</i> |        | transcription elongation factor |
| 4E+06    | sn-glycerol-3-phosphate         |        | <i>glpD</i> | > | <   | < | <i>glgP</i> |        | glycogen phosphorylase          |
| 4E+06    | IM protein                      |        | <i>yhiM</i> | > | <   | < | <i>yhiN</i> |        | oxidoreductase                  |
| 4E+06    | Trp tRNA                        |        | <i>trpT</i> | > | <   | < | <i>hdfR</i> |        | transcription factor            |
| 4E+06    | heat shock protein              |        | <i>yjaZ</i> | > | <   | < | <i>sroH</i> |        | SroH small RNA                  |
| 5E+06    | ncRNA                           |        | <i>symR</i> | > | <   | < | <i>hdsS</i> |        | HsdM and HsdR regulator         |

Total, 10 peaks

#### Inside ORF

| Position | Function                            | Operon           | Gene        | D | Lrp         | D | Gene        | Operon                     | Function                            |
|----------|-------------------------------------|------------------|-------------|---|-------------|---|-------------|----------------------------|-------------------------------------|
| 168      | predicted protein                   |                  | <i>yjiY</i> | > | <i>yjtD</i> | > | <i>thrL</i> | <i>thrLABC</i>             | <i>thr</i> operon leader peptide    |
| 102758   | UDP-N-acetylmuramate:alanine ligase |                  | <i>murC</i> | > | <i>ddlB</i> | > | <i>ftsQ</i> | <i>ftsQAZ-lpxC</i>         | cell division septum protein        |
| 223368   | DL-methionine transporter           | <i>metNIQ</i>    | <i>metN</i> | < | <i>gmhB</i> | > | <i>rrsH</i> | <i>rrsH-ileV-alaV-rrfH</i> | 16S rRNA                            |
| 296170   | CP4-6 prophage protein              | <i>yagN</i>      | <i>yagN</i> | < | <i>intF</i> | < | <i>yagP</i> |                            | predicted transcriptional regulator |
| 302552   | predicted xanthine dehydrogenase    | <i>yagTSRQ</i>   | <i>yagT</i> | < | <i>yagU</i> | < | <i>ykgJ</i> |                            | predicted ferredoxin                |
| 360530   | predicted cyanate transporter       |                  | <i>cynX</i> | > | <i>lacA</i> | < | <i>lacY</i> |                            | lactose/galactose transporter       |
| 515656   | membrane-associated protease        | <i>qmcA-ybbJ</i> | <i>qmcA</i> | < | <i>ybbL</i> | > | <i>ybbM</i> | <i>ybbM</i>                | predicted IM protein                |
| 526956   | rhd element protein                 |                  | <i>rhdS</i> | > | <i>ybbC</i> | > | <i>ybbH</i> | <i>ybbH-ybbD</i>           | conserved protein                   |
| 568958   | DLP12 MD resistance protein         |                  | <i>emrE</i> | > | <i>ybcK</i> | > | <i>ybcL</i> | <i>ybcLM</i>               | DLP12 prophage kinase inhibitor     |
| 578634   | DLP12 prophage lipoprotein          | <i>borD</i>      | <i>borD</i> | < | <i>ybcV</i> | > | <i>ybcW</i> | <i>ybcW</i>                | DLP12 prophage protein              |
| 636446   | conserved protein                   | <i>ybdN</i>      | <i>ybdN</i> | < | <i>ybdO</i> | < | <i>dsbG</i> |                            | disulfide isomerase                 |
| 677132   | predicted protein                   |                  | <i>ybeR</i> | > | <i>djIB</i> | < | <i>ybeT</i> |                            | conserved OM protein                |
| 737356   | predicted transposase               |                  | <i>ybfQ</i> | > | <i>ybfD</i> | > | <i>ybgA</i> | <i>ybgA-phr</i>            | conserved protein                   |
| 776330   | ToIAQR complex protein              |                  | <i>tolR</i> | > | <i>tolA</i> | > | <i>tolB</i> | <i>tolB-pal-ybgF</i>       | periplasmic protein                 |
| 811762   | biotin synthesis methyltransferase  |                  | <i>bioC</i> | > | <i>bioD</i> | < | <i>ybhU</i> |                            | hypothetical protein                |
| 906136   | NAD(P)H-binding oxidoreductase      |                  | <i>ybjS</i> | < | <i>ybjT</i> | < | <i>ltaE</i> |                            | L-allo-threonine aldolase           |
| 909154   | L-allo-threonine aldolase           | <i>ltaE-ybjT</i> | <i>ltaE</i> | < | <i>poxB</i> | < | <i>hcr</i>  |                            | HCP oxidoreductase                  |
| 921444   | macrolide transporter               |                  | <i>macA</i> | > | <i>macB</i> | < | <i>cspD</i> |                            | cold shock protein homolog          |
| 988572   | asparaginyl tRNA synthetase         | <i>asnS</i>      | <i>asnS</i> | < | <i>pncB</i> | > | <i>pepN</i> | <i>pepN</i>                | aminopeptidase N                    |



|       |                                         |                                        |             |   |                         |   |             |                             |                                                  |
|-------|-----------------------------------------|----------------------------------------|-------------|---|-------------------------|---|-------------|-----------------------------|--------------------------------------------------|
| 1E+06 | predicted hydrolase                     |                                        | <i>ymdC</i> | > | <i>mdo</i>              | > | <i>mdoG</i> | <i>mdoGH</i>                | glucan biosynthesis protein                      |
| 1E+06 | RpoS proteolysis inhibitor              | <i>iraM</i>                            | <i>iraM</i> | < | <i>ycqX</i>             | < | <i>ycqE</i> |                             | predicted transcription factor                   |
| 1E+06 | Tyr tRNA                                | <i>tyrTV-tp</i>                        | <i>tyrT</i> | < | <i>purU</i>             | < | <i>ychJ</i> |                             | conserved protein                                |
| 1E+06 | aconitate hydratase 1                   |                                        | <i>acrA</i> | > | <i>ribA</i>             | > | <i>pqpB</i> | <i>pqpB</i>                 | phosphatidylglycerophosphatase B                 |
| 1E+06 | conserved IM protein                    |                                        | <i>ycjF</i> | > | <i>tyrR</i>             | < | <i>tpx</i>  |                             | lipid hydroperoxide peroxidase                   |
| 1E+06 | fermentative D-lactate dehydrogenase    | <i>ldhA</i>                            | <i>ldhA</i> | < | <i>ydbH</i>             | > | <i>ynbE</i> | <i>ynbE-ydbL</i>            | predicted lipoprotein                            |
| 1E+06 | L7/L12-serine acetyltransferase         |                                        | <i>rimL</i> | > | <i>ydcK</i>             | > | <i>tehA</i> | <i>tehAB</i>                | proflavin transporter                            |
| 2E+06 | predicted protein                       |                                        | <i>ydcD</i> | > | <i>ydcC</i>             | > | <i>pptA</i> | <i>pptA</i>                 | 4-oxalocrotonate tautomerase                     |
| 2E+06 | predicted peptidase                     | <i>pqqL</i>                            | <i>pqqL</i> | < | <i>yddB</i>             | < | <i>yddA</i> |                             | ABC-family MD transporter                        |
| 2E+06 | autoinducer-2 (AI-2) kinase             | <i>lsrK</i>                            | <i>lsrK</i> | < | <i>lsrR</i>             | > | <i>lsrA</i> | <i>lsrACDBFG-</i>           | ABC-family AI2 transporter                       |
| 2E+06 | cysteine acetyl-serine efflux system    | <i>eamA</i>                            | <i>eamA</i> | < | <i>ydeE</i>             | > | <i>yneM</i> | <i>yneM</i>                 | hypothetical protein                             |
| 2E+06 | predicted protein                       |                                        | <i>ynfD</i> | > | <i>ynfE</i>             | > | <i>ynfF</i> | <i>ynfFGH-dmsD</i>          | oxidoreductase subunit                           |
| 2E+06 | OM porin protein                        | <i>uidBC</i>                           | <i>uidB</i> | < | <i>uidA</i>             | < | <i>uidR</i> |                             | transcription factor                             |
| 2E+06 | threonyl-tRNA synthetase                | <i>thrS-infC-rpmI-rplT-pheMST-ihfA</i> | <i>thrS</i> | < | <i>arpB</i>             | > | <i>yniD</i> | <i>yniD</i>                 | predicted protein                                |
| 2E+06 | predicted acyltransferase               |                                        | <i>yedN</i> | < | <i>yedN<sub>1</sub></i> | < | <i>yedM</i> |                             | conserved protein                                |
| 2E+06 | IS5 transposase and trans-activator     | <i>insH</i>                            | <i>insH</i> | < | <i>wbbK</i>             | < | <i>wbbJ</i> |                             | predicted acyl transferase                       |
| 2E+06 | conserved protein                       | <i>wbbJJK</i>                          | <i>wbbJ</i> | < | <i>rfc</i>              | < | <i>glf</i>  |                             | UDP-galactopyranose mutase                       |
| 2E+06 | O-antigen polymerase                    |                                        | <i>rfc</i>  | < | <i>glf</i>              | < | <i>rfbX</i> |                             | polisoprenol-linked O-antigen                    |
| 2E+06 | UDP-galactopyranose mutase              | <i>glf-rfc</i>                         | <i>glf</i>  | < | <i>rfbX</i>             | < | <i>rfbC</i> |                             | dTDP-4-deoxyrihamnose-3,5-                       |
| 2E+06 | predicted subunit with GalU             | <i>galF</i>                            | <i>galF</i> | > | <i>wcaM</i>             | < | <i>wcaL</i> |                             | predicted glycosyl transferase                   |
| 2E+06 | IS3 element protein InsF                |                                        | <i>insF</i> | > | <i>gatR</i>             | < | <i>gatD</i> |                             | galactitol-1-phosphate dehydrogenase             |
| 2E+06 | predicted OM protein                    | <i>yehBA</i>                           | <i>yehB</i> | < | <i>yehC</i>             | < | <i>yehD</i> |                             | predicted fimbrial-like adhesin protein          |
| 2E+06 | predicted protein                       | <i>yfaTS</i>                           | <i>yfaT</i> | < | <i>yfaA</i>             | < | <i>gyrA</i> |                             | DNA gyrase (type II topoisomerase)               |
| 2E+06 | predicted NUDIX hydrolase               |                                        | <i>nudI</i> | > | <i>ais</i>              | > | <i>arnB</i> | <i>arnBCADTEF</i>           | Ur (pentapyranosyl diphosphate) aminotransferase |
| 2E+06 | enoyl-CoA hydratase and epimerase       | <i>fadJ</i>                            | <i>fadJ</i> | < | <i>fadI</i>             | < | <i>yfcZ</i> |                             | conserved protein                                |
| 2E+06 | predicted CoA-transferase               | <i>yfdE</i>                            | <i>yfdE</i> | < | <i>yfdV</i>             | < | <i>oxc</i>  |                             | predicted oxalyl-CoA decarboxylase               |
| 3E+06 | transaldolase A                         |                                        | <i>talA</i> | > | <i>tktB</i>             | < | <i>ypfG</i> |                             | predicted protein                                |
| 3E+06 | predicted protein                       |                                        | <i>yfiR</i> | > | <i>yfiN</i>             | > | <i>yfiB</i> | <i>yfiB</i>                 | predicted OM lipoprotein                         |
| 3E+06 | CP4-57 prophage protein                 | <i>ypjM</i>                            | <i>ypjM</i> | < | <i>yfjW</i>             | > | <i>yfjX</i> | <i>yfjXY-ypjJ-yfjZ-ypjF</i> | CP4-57 antirestriction protein                   |
| 3E+06 | alanyl-tRNA synthetase                  | <i>alaS</i>                            | <i>alaS</i> | < | <i>recX</i>             | < | <i>recA</i> |                             | recombination protein                            |
| 3E+06 | enolase                                 | <i>eno</i>                             | <i>eno</i>  | < | <i>pyrG</i>             | < | <i>mazG</i> |                             | NTP pyrophosphohydrolase                         |
| 3E+06 | L-fucose-1-phosphate aldolase           | <i>fucAO</i>                           | <i>fucA</i> | < | <i>fucP</i>             | > | <i>fucI</i> | <i>fucIKUR</i>              | L-fucose isomerase                               |
| 3E+06 | predicted chaperone                     |                                        | <i>ygeG</i> | > | <i>ygeH</i>             | > | <i>ygeI</i> | <i>ygeI</i>                 | predicted protein                                |
| 3E+06 | conserved protein                       | <i>ygiQ</i>                            | <i>ygiQ</i> | < | <i>ftsP</i>             | < | <i>plsC</i> |                             | acyl-glycerol-3-phosphate                        |
| 3E+06 | conserved IM protein                    |                                        | <i>ygiH</i> | > | <i>ttdR</i>             | > | <i>ttdA</i> | <i>ttdABT</i>               | L-tartrate dehydratase                           |
| 3E+06 | conserved IM protein                    |                                        | <i>yqjA</i> | > | <i>yqjB</i>             | > | <i>yqjC</i> | <i>yqjCDEK</i>              | conserved protein                                |
| 3E+06 | predicted protein                       |                                        | <i>yhaB</i> | > | <i>yhaC</i>             | < | <i>rnpB</i> |                             | ncRNA                                            |
| 4E+06 | heat shock protein Hsp33                |                                        | <i>hslO</i> | > | <i>yhgE</i>             | > | <i>pck</i>  | <i>pck</i>                  | phosphoenolpyruvate carboxykinase                |
| 4E+06 | predicted acetyltransferase             |                                        | <i>yhhY</i> | > | <i>yhhZ</i>             | > | <i>yrhA</i> | <i>yrhA-insA-6AB</i>        | conserved protein                                |
| 4E+06 | <i>rhsB</i> element core protein RshB   |                                        | <i>rhsB</i> | > | <i>yhhh</i>             | > | <i>yhhl</i> | <i>yhhl</i>                 | predicted transposase                            |
| 4E+06 | predicted transposase                   |                                        | <i>yhhI</i> | > | <i>yhhJ</i>             | < | <i>rbbA</i> |                             | ribosome-associated ATPase                       |
| 4E+06 | predicted HlyD family secretion protein | <i>yhil-rbbA-</i>                      | <i>yhil</i> | < | <i>yhiJ</i>             | < | <i>yhiK</i> |                             | predicted protein                                |
| 4E+06 | MgtC-family IM transporterr             | <i>yhiD</i>                            | <i>yhiD</i> | < | <i>hdeB</i>             | < | <i>hdeA</i> |                             | acid-resistance protein                          |
| 4E+06 | multidrug transporter                   |                                        | <i>mdtF</i> | > | <i>gadW</i>             | > | <i>gadY</i> | <i>gadY</i>                 | ncRNA                                            |
| 4E+06 | ncRNA                                   |                                        | <i>rdiD</i> | > | <i>yhiV</i>             | < | <i>dppF</i> |                             | dipeptide transporter                            |
| 4E+06 | predicted transporter                   | <i>yhiX</i>                            | <i>yhiX</i> | > | <i>yhiY</i>             | > | <i>tag</i>  | <i>tag-yiaC</i>             | 3-methyl-adenine DNA glycosylase I               |
| 4E+06 | predicted protein                       | <i>ysaB</i>                            | <i>ysaB</i> | < | <i>wecH</i>             | < | <i>yiaA</i> |                             | conserved IM protein                             |
| 4E+06 | predicted glutathione S-transferase     | <i>yibF</i>                            | <i>yibF</i> | < | <i>rhsA</i>             | > | <i>yibA</i> | <i>yibA</i>                 | lyase containing HEAT-repeat                     |
| 4E+06 | <i>rhsA</i> element core protein        |                                        | <i>rhsA</i> | > | <i>yibA</i>             | > | <i>yibG</i> | <i>yibG</i>                 | conserved protein                                |
| 4E+06 | LPS core biosynthesis                   | <i>waaK</i>                            | <i>waaK</i> | < | <i>rfaZ</i>             | < | <i>rfaY</i> |                             | LP core biosynthesis protein                     |
| 4E+06 | UDP-D-galactose galactosyltransferase   | <i>waaBIJY-rfaZ-waaK</i>               | <i>waaB</i> | < | <i>rfaS</i>             | < | <i>rfaP</i> |                             | LP kinase                                        |
| 4E+06 | predicted alpha-glucosidase             | <i>yicI</i>                            | <i>yicI</i> | < | <i>yicJ</i>             | > | <i>selC</i> | <i>selC</i>                 | Sec tRNA                                         |
| 4E+06 | conserved IM protein                    | <i>yigF</i>                            | <i>yigF</i> | < | <i>yigG</i>             | < | <i>rarD</i> |                             | chloramphenicol resistance permease              |
| 4E+06 | OM porin protein                        | <i>ompL</i>                            | <i>ompL</i> | < | <i>yihO</i>             | < | <i>yihP</i> |                             | predicted transporter                            |
| 4E+06 | isocitrate dehydrogenase kinase         |                                        | <i>aceK</i> | > | <i>arpA</i>             | < | <i>iclR</i> |                             | transcription factor                             |
| 4E+06 | predicted cation/proton antiporter      |                                        | <i>yjcE</i> | > | <i>yjcF</i>             | < | <i>actP</i> |                             | acetate transporter                              |
| 4E+06 | formate-dependent nitrite reductase     |                                        | <i>nrFD</i> | > | <i>nrFE</i>             | > | <i>nrFF</i> | <i>nrFFG</i>                | heme lyase (NrfEFG)                              |
| 4E+06 | transcription factor                    | <i>melR</i>                            | <i>melR</i> | > | <i>melA</i>             | > | <i>melB</i> | <i>melB</i>                 | melibiose:sodium symporter                       |
| 4E+06 | predicted protein                       |                                        | <i>yjdO</i> | > | <i>lysU</i>             | < | <i>yjdL</i> |                             | predicted transporter                            |
| 4E+06 | predicted lysyl-tRNA synthetase         |                                        | <i>poxA</i> | > | <i>yjeM</i>             | > | <i>yjeN</i> | <i>yjeNO</i>                | predicted protein                                |
| 4E+06 | cell envelope opacity protein           | <i>ytfB</i>                            | <i>ytfB</i> | < | <i>fkIB</i>             | > | <i>cycA</i> | <i>cycA</i>                 | D-alanine/D-serine/glycine transporter           |
| 4E+06 | predicted IM protein                    | <i>ytfF</i>                            | <i>ytfF</i> | < | <i>ytfG</i>             | > | <i>ytfH</i> | <i>ytfH</i>                 | transcription factor                             |
| 4E+06 | ABC-family sugar transporter y          |                                        | <i>yjff</i> | > | <i>fbp</i>              | > | <i>mpl</i>  | <i>mpl</i>                  | UDP-N-acetylmuramate ligase                      |
| 5E+06 | KpLE2 transposase                       | <i>insG</i>                            | <i>insG</i> | < | <i>yjhb</i>             | > | <i>yjhc</i> | <i>yjhc</i>                 | KpLE2 phage oxidoreductase                       |
| 5E+06 | KpLE2 phage transporter                 |                                        | <i>yjhb</i> | > | <i>yjhc</i>             | > | <i>ytha</i> | <i>ytha</i>                 | small predicted membrane protein                 |
| 5E+06 | ncRNA                                   |                                        | <i>symR</i> | > | <i>hsdS</i>             | < | <i>hsdM</i> |                             | DNA methylase M                                  |
| 5E+06 | lipoate-protein ligase A                | <i>lplA</i>                            | <i>lplA</i> | < | <i>ytiB</i>             | > | <i>serB</i> | <i>serB-radA-</i>           | 3-phosphoserine phosphatase                      |

Total, 86 (possible targets, 89)

## Supplemental Table S2

### Amino acids and peptides affecting the growth of *lrp* mutant

#### 1) Compounds affecting the growth retardation

---

|             |                                                   |
|-------------|---------------------------------------------------|
| Amino acids | L-Ala, L-Cys, L-Gly, L-Ser, L-Trp<br>D-Ala, D-Ser |
|-------------|---------------------------------------------------|

---

|          |                                                                                                                                                                                                                                                                                                                                                                                                                                                                |
|----------|----------------------------------------------------------------------------------------------------------------------------------------------------------------------------------------------------------------------------------------------------------------------------------------------------------------------------------------------------------------------------------------------------------------------------------------------------------------|
| Peptides | Ala-Gly, Ala-His, Ala-Thr, Gly-Asn, Ala-Ala, Ala-Arg, Ala-Asn,<br>Ala-His, Ala-Ser, Ala-Thr, Arg-Ser, Gln-Gln, Gly-Ala, Gly-Arg,<br>Gly-Gly, Gly-Lys, Gly-Met, Gly-Ser, Gly-Thr, Leu-Ala, Leu-Arg,<br>Leu-Glu, Met-Gly, Phe-Ala, Phe-Gly, Phe-Ser, Ser-Ala,<br>Ser-Gly, Ser-His, Ser-Met, Ser-Phe, Ser-Ser, Thr-Ala, Thr-Gly,<br>Trp-Ala, Trp-Leu, Trp-Ser, Tyr-Ala, Tyr-Gly, Lys-Gly, Met-Thr,<br>Ser-Asn, Ala-Ala-Ala, Gly-Gly-Ile, Gly-Gly-Leu, Gly-Gly-Phe |
|----------|----------------------------------------------------------------------------------------------------------------------------------------------------------------------------------------------------------------------------------------------------------------------------------------------------------------------------------------------------------------------------------------------------------------------------------------------------------------|

---

#### 2) Compounds affecting the growth enhancement

---

|             |      |
|-------------|------|
| Amino acids | None |
|-------------|------|

---

|          |                                                                                             |
|----------|---------------------------------------------------------------------------------------------|
| Peptides | Pro-Phe, Pro-Pro, Pro-Tyr, Tyr-Glu, His-Glu, Phe-Asp,<br>Phe-Glu, Pro-Glu, Pro-Ile, Pro-Trp |
|----------|---------------------------------------------------------------------------------------------|

---

**Supplemental Table S3**  
**Concentration of major intermediate metabolites in wild-type and lrp mutant**  
**(measured by TOF/MS)**

| Annotation Name               | Ave m/z | Conc (pmol/OD/ml) |            |                |
|-------------------------------|---------|-------------------|------------|----------------|
|                               |         | WT                | lrp mutant | ratio (lrp/wt) |
| Glyoxylate                    | 72.996  | 0.0               | 0.0        | –              |
| Glycolate                     | 75.011  | 0.0               | 0.0        | –              |
| Gly                           | 76.042  | 319.3             | 833.1      | 2.61           |
| Pyruvate                      | 87.009  | 0.0               | 0.0        | –              |
| Lactate                       | 89.026  | 4234.6            | 2227.6     | 0.53           |
| Putrescine(1,4-Butanediamine) | 89.109  | 282.6             | 96.0       | 0.34           |
| beta-Ala                      | 90.057  | 9.2               | 3.4        | 0.38           |
| Ala                           | 90.058  | 192.6             | 87.1       | 0.45           |
| Spermine divalent             | 102.118 | 0.0               | 0.0        | –              |
| GABA                          | 104.073 | 55.8              | 6.3        | 0.11           |
| 2-Aminobutyrate               | 104.073 | 51.4              | 25.7       | 0.50           |
| Ser                           | 106.051 | 121.4             | 70.5       | 0.58           |
| Hypotaurine                   | 110.027 | 0.0               | 0.0        | –              |
| Cytosine                      | 112.051 | 1.2               | 1.4        | 1.12           |
| Uracil                        | 113.035 | 0.0               | 0.0        | –              |
| Carnosine divalent            | 114.062 | 0.0               | 0.0        | –              |
| Fumarate                      | 115.005 | 197.6             | 219.0      | 1.11           |
| 2-Oxoisopentanoate            | 115.042 | 0.0               | 0.0        | –              |
| Pro                           | 116.071 | 54.7              | 32.3       | 0.59           |
| Succinate                     | 117.020 | 228.5             | 195.5      | 0.86           |
| Val                           | 118.087 | 162.9             | 162.2      | 1.00           |
| Thr                           | 120.066 | 150.1             | 73.6       | 0.49           |
| Homoserine                    | 120.066 | 36.5              | 23.0       | 0.63           |
| Cys                           | 122.028 | 0.0               | 0.0        | –              |
| Taurine                       | 126.022 | 0.0               | 0.0        | –              |
| Hydroxyproline                | 132.066 | 0.0               | 0.0        | –              |
| Creatine                      | 132.077 | 0.0               | 0.0        | –              |
| Ile                           | 132.102 | 11.8              | 7.5        | 0.63           |
| Leu                           | 132.102 | 43.9              | 47.8       | 1.09           |
| Malate                        | 133.015 | 479.3             | 448.1      | 0.93           |
| Asn                           | 133.061 | 81.4              | 74.5       | 0.91           |
| Ornithine                     | 133.097 | 5.9               | 4.4        | 0.74           |
| Asp                           | 134.044 | 244.1             | 86.9       | 0.36           |
| Homocysteine                  | 136.042 | 0.0               | 0.0        | –              |
| Adenine                       | 136.063 | 94.3              | 49.1       | 0.52           |
| Hypoxanthine                  | 137.046 | 204.5             | 127.5      | 0.62           |
| Anthranilate                  | 138.055 | 0.0               | 0.0        | –              |
| Tyramine                      | 138.092 | 1.6               | 1.0        | 0.59           |
| 2-Oxoglutarate                | 145.015 | 0.0               | 0.0        | –              |
| Spermidine                    | 146.164 | 1.4               | 0.0        | 0.00           |
| 2-Hydroxyglutarate            | 147.031 | 0.0               | 25.7       | –              |
| Gln                           | 147.077 | 339.5             | 82.1       | 0.24           |
| Lys                           | 147.113 | 335.8             | 407.3      | 1.21           |
| Glu                           | 148.061 | 3598.3            | 753.6      | 0.21           |
| Met                           | 150.059 | 24.9              | 23.9       | 0.96           |
| Cysteine sulfinic acid        | 152.004 | 0.0               | 0.0        | –              |
| Guanine                       | 152.057 | 29.7              | 23.5       | 0.79           |
| His                           | 156.077 | 30.4              | 31.3       | 1.03           |
| Phe                           | 166.086 | 34.4              | 52.9       | 1.54           |
| PEP                           | 166.976 | 483.3             | 366.9      | 0.76           |
| DHAP                          | 168.992 | 0.0               | 0.0        | –              |
| DHAP                          | 168.992 | 76.0              | 16.5       | 0.22           |

|                           |         |        |        |      |
|---------------------------|---------|--------|--------|------|
| Glycerophosphate          | 171.007 | 337.5  | 225.6  | 0.67 |
| cis-Aconitate             | 173.010 | 6.2    | 2.5    | 0.41 |
| Arg                       | 175.120 | 143.9  | 105.3  | 0.73 |
| Citrulline                | 176.103 | 9.1    | 11.4   | 1.25 |
| Tyr                       | 182.081 | 115.9  | 210.6  | 1.82 |
| 3PG;2PG                   | 184.987 | 1408.5 | 1135.0 | 0.81 |
| 2PG                       | 184.987 | 0.0    | 0.0    | -    |
| Citrate                   | 191.021 | 38.4   | 45.5   | 1.19 |
| Isocitrate                | 191.022 | 0.0    | 0.0    | -    |
| S-Adenosylhomocysteine    | 193.069 | 2.0    | 1.7    | 0.82 |
| Gluconate                 | 195.052 | 0.0    | 0.0    | -    |
| DOPA                      | 198.076 | 0.0    | 0.0    | -    |
| S-Adenosylmethionine      | 200.078 | 39.9   | 36.6   | 0.92 |
| Trp                       | 205.098 | 1.9    | 3.7    | 1.95 |
| Cystathionine             | 223.074 | 0.0    | 0.0    | -    |
| R5P                       | 229.013 | 45.4   | 30.2   | 0.67 |
| Ru5P                      | 229.013 | 76.8   | 31.6   | 0.41 |
| gamma-Glu-2-aminobutyrate | 233.113 | 0.0    | 2.6    | -    |
| Cytidine                  | 244.094 | 0.0    | 0.8    | -    |
| Uridine                   | 245.077 | 0.0    | 0.0    | -    |
| gamma-Glu-cys             | 251.071 | 0.0    | 0.0    | -    |
| G6P                       | 259.023 | 174.0  | 108.2  | 0.62 |
| F6P                       | 259.024 | 52.7   | 39.6   | 0.75 |
| G1P                       | 259.024 | 76.8   | 34.9   | 0.45 |
| 2,3-DPG                   | 264.954 | 34.3   | 8.5    | 0.25 |
| Adenosine                 | 268.104 | 4.9    | 10.2   | 2.09 |
| Inosine                   | 269.088 | 11.0   | 16.0   | 1.45 |
| 6-Phosphogluconate        | 275.019 | 18.6   | 9.8    | 0.52 |
| Guanosine                 | 284.100 | 4.9    | 6.1    | 1.23 |
| S7P                       | 289.035 | 66.1   | 32.8   | 0.50 |
| Ophthalmate               | 290.135 | 156.5  | 291.8  | 1.86 |
| Glutathione(ox)           | 307.084 | 1185.5 | 821.3  | 0.69 |
| Glutathione(red)          | 308.092 | 0.0    | 0.0    | -    |
| dTMP                      | 321.050 | 70.9   | 68.2   | 0.96 |
| CMP                       | 322.046 | 82.7   | 35.9   | 0.43 |
| cAMP                      | 328.046 | 31.8   | 31.1   | 0.98 |
| F1,6P                     | 338.990 | 129.1  | 32.5   | 0.25 |
| cGMP                      | 344.042 | 0.0    | 0.0    | -    |
| AMP                       | 346.057 | 175.0  | 196.2  | 1.12 |
| IMP                       | 347.041 | 77.1   | 202.5  | 2.63 |
| GMP                       | 362.052 | 14.5   | 16.5   | 1.14 |
| NADPH                     | 371.540 | 0.0    | 0.0    | -    |
| CoA                       | 382.558 | 0.0    | 0.0    | -    |
| PRPP                      | 388.947 | 0.0    | 0.0    | -    |
| dTDP                      | 401.017 | 54.8   | 34.5   | 0.63 |
| CDP                       | 402.012 | 124.6  | 54.4   | 0.44 |
| Acetyl CoA                | 403.559 | 20.5   | 1.0    | 0.05 |
| Malonyl CoA               | 425.554 | 0.0    | 0.0    | -    |
| ADP                       | 426.024 | 751.1  | 654.7  | 0.87 |
| Succinyl CoA              | 432.563 | 0.0    | 0.0    | -    |
| GDP                       | 442.018 | 295.7  | 211.1  | 0.71 |
| dCTP                      | 465.984 | 108.6  | 66.7   | 0.61 |
| dTTP                      | 480.984 | 209.7  | 94.2   | 0.45 |
| CTP                       | 481.979 | 627.1  | 244.1  | 0.39 |
| UTP                       | 482.962 | 1638.6 | 925.4  | 0.56 |
| dATP                      | 489.995 | 209.2  | 115.2  | 0.55 |
| ATP                       | 505.990 | 3894.2 | 2378.2 | 0.61 |



|       |         |        |        |      |
|-------|---------|--------|--------|------|
| GTP   | 521.985 | 1945.9 | 1020.3 | 0.52 |
| NAD+  | 662.103 | 975.9  | 580.3  | 0.59 |
| NADH  | 664.119 | 0.0    | 0.0    | -    |
| NADP+ | 742.070 | 413.2  | 218.6  | 0.53 |
| FAD   | 784.153 | 17.7   | 0.0    | 0.00 |

---
